# Supplementary material for: Preclinical Studies with Glioblastoma Brain Organoid Co-Cultures Show Efficient 5-ALA Photodynamic Therapy
Source: MDPI journal article supplement (doi:10.3390/cells12081125), 2023-04-10
Supplement: s1 [file s1]

*Supplementary Material*

# Preclinical Studies with Glioblastoma Brain Organoid Co-Cultures Show Efficient 5-ALA Photodynamic Therapy

Leire Pedrosa <sup>1,†</sup>, Carmen Bedia <sup>2,†</sup>, Diouldé Diao <sup>1</sup>, Alejandra Mosteiro <sup>3</sup>, Abel Ferrés <sup>3</sup>, Elisabetta Stanzani <sup>4</sup>, Fina Martínez-Soler <sup>5</sup>, Avelina Tortosa <sup>5</sup>, Estela Pineda <sup>6</sup>, Iban Aldecoa <sup>7,8</sup>, Marc Centellas <sup>9</sup>, Marta Muñoz-Tudurí <sup>9</sup>, Ana Sevilla <sup>10,11,\*</sup>, Àngels Sierra <sup>1,12,\*</sup> and José Juan González Sánchez <sup>1,3</sup>

<sup>1</sup> Laboratory of Experimental Oncological Neurosurgery, Neurosurgery Service, Hospital Clínic de Barcelona—FCRB, 08036 Barcelona, Spain

<sup>2</sup> Institute of Environmental Assessment and Water Research (IDAEA-CSIC), 08034 Barcelona, Spain

<sup>3</sup> Department of Neurosurgery, Hospital Clínic de Barcelona, University of Barcelona, 08036 Barcelona, Spain

<sup>4</sup> Laboratory of Pharmacology and Brain Pathology, IRCCS Humanitas Research Hospital, 20089 Milan, Italy

<sup>5</sup> Apoptosis and Cancer Unit, Department of Basic Nursing, IDIBELL, Faculty of Medicine and Health Sciences, University of Barcelona, 08907 L'Hospitalet del Llobregat, Spain

<sup>6</sup> Medical Oncology Department, Hospital Clínic and Translational Genomics and Targeted Therapies in Solid Tumors, IDIBAPS, 08036 Barcelona, Spain

<sup>7</sup> Department of Pathology, Biomedical Diagnostic Center, Hospital Clínic de Barcelona, University of Barcelona, 08036 Barcelona, Spain

<sup>8</sup> Neurological Tissue Bank of the Biobank, Institute of Biomedical Research August Pi i Sunyer (IDIBAPS), 08036 Barcelona, Spain

<sup>9</sup> Laboratorios Gebro Pharma S.A., 08022 Barcelona, Spain

<sup>10</sup> Department of Cell Biology, Physiology and Immunology, Faculty of Biology, University of Barcelona, 08028 Barcelona, Spain

<sup>11</sup> Institute of Biomedicine, University of Barcelona (IBUB), 08036 Barcelona, Spain

<sup>12</sup> Department of Medicine and Life Sciences (MELIS), Faculty of Health and Live Sciences, Universitat Pompeu Fabra, 08036 Barcelona, Spain

\* Correspondence: anasevilla@ub.edu (A.S.); masierra@clinic.cat (À.S.)

† These authors have contributed equally to this work.

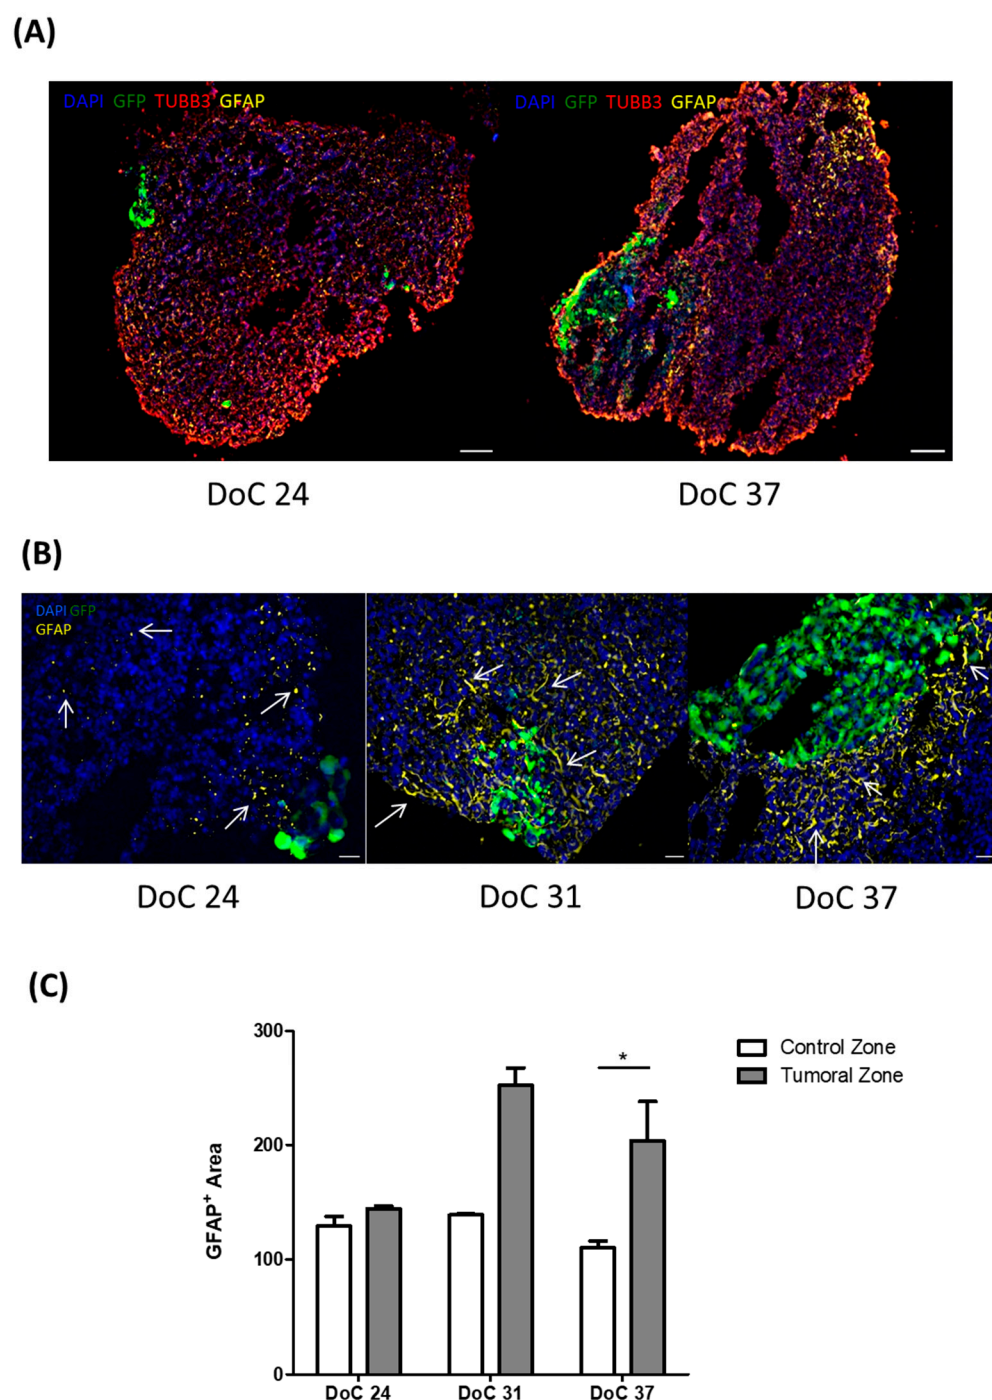

**Figure S1.** Immunofluorescence (IF) analyses of GFP-PG88-co-cultured with the cerebral organoid. (A) IF merged TUBB3 (red) and GFAP (yellow) at 24 (left) and 37 (right) days of co-culture (DoC). TUBB3 is homogeneously expressed in all organoids on both days.  $N = 3$ . (B) Sequential images of samples on DoC 24 (left panel), on DoC 31 (middle panel), and on DoC 37 (right panel) after engraftment with GFP-PG88. Anti-GFAP antibody stain visualizing astrocytes in the human organoids are merged with GFP+ cells signal and nuclei staining. Images are representative images of 3 different organoids analyzed, 6 fields with tumor and 9 fields without tumor, are obtained with the objective 10 $\times$  and 40 $\times$  with Microscopy Olympus BX41. Scale bar 100  $\mu$ m (10 $\times$ ) and 20  $\mu$ m (40 $\times$ ). White arrows highlight the GFAP+ cells. (C) GFAP+ cells area was studied in the tumor and control area far from the tumor-induced with PG88 cells at different days of organoid and GFP-GIC co-culture. The histogram represents the area of the GFAP+ cells of organoid and GFP-GIC co-culture: day 24 ( $n = 3$ , 6 fields with tumor and 9 fields without tumor), day 31 ( $n = 2$ , 4 fields with tumor and 4 fields without tumor) and day 37 ( $n = 3$ , 8 fields with tumor and 6 fields without tumor). The GFAP

area was analyzed, by ImageJ, in GFP-GICs tumor area, and in areas without infiltrating GFP-GICs (control zone). ANOVA test was used to compare the means of different groups (\*  $p < 0.05$ ).

**(A)**

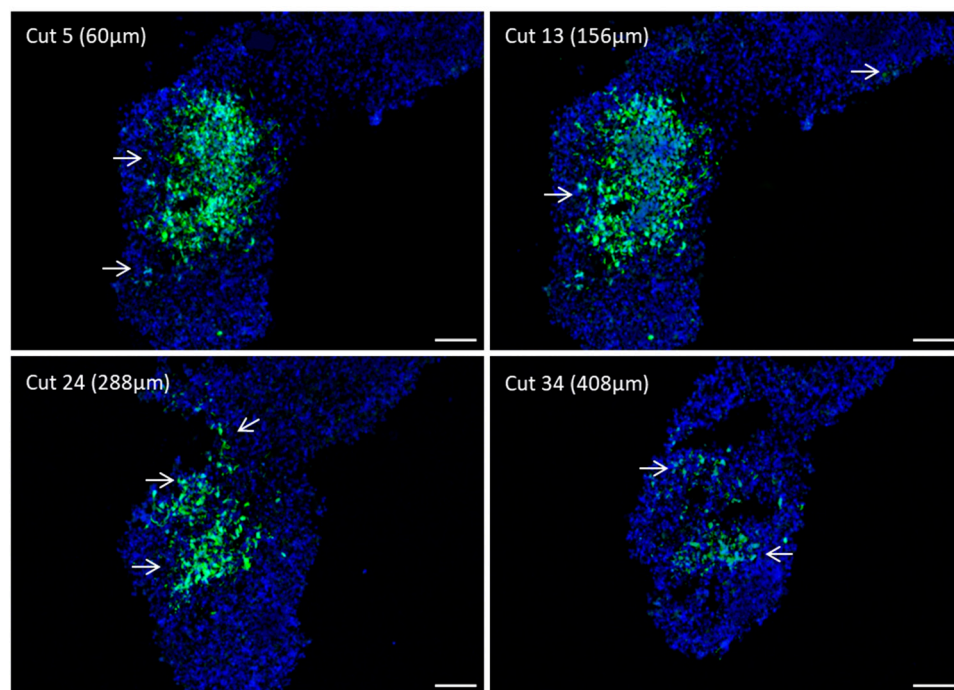

**(B)**

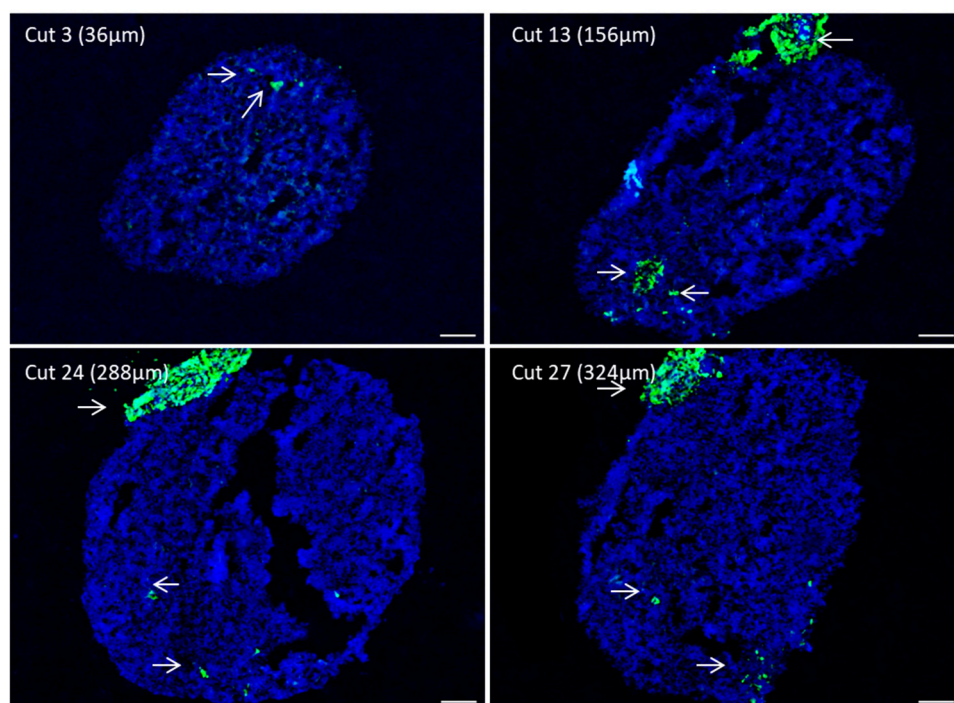

**Figure S2.** Invasive ability of GFP-GICs into organoids. Consecutive cuts in the same sample show infiltration of GFP-GIC7 **(A)** and GFP-PG88 **(B)** into the organoid at DoC 37. **(A)** For GFP-GIC7 the cut numbers 5, 13, 24, and 34 are shown, corresponding to 60, 156, 288, and 408 μm of depth into the organoid, respectively. **(B)** For GFP-PG88, the cut numbers 3, 13, 24, and 27 are shown, corresponding to 36, 156, 288, and 324 μm of depth into the organoid, respectively. The GFP-GICs are found in all cuts (white arrows)—nuclei labelled by Dapi. Scale bar 100 μm (10×).

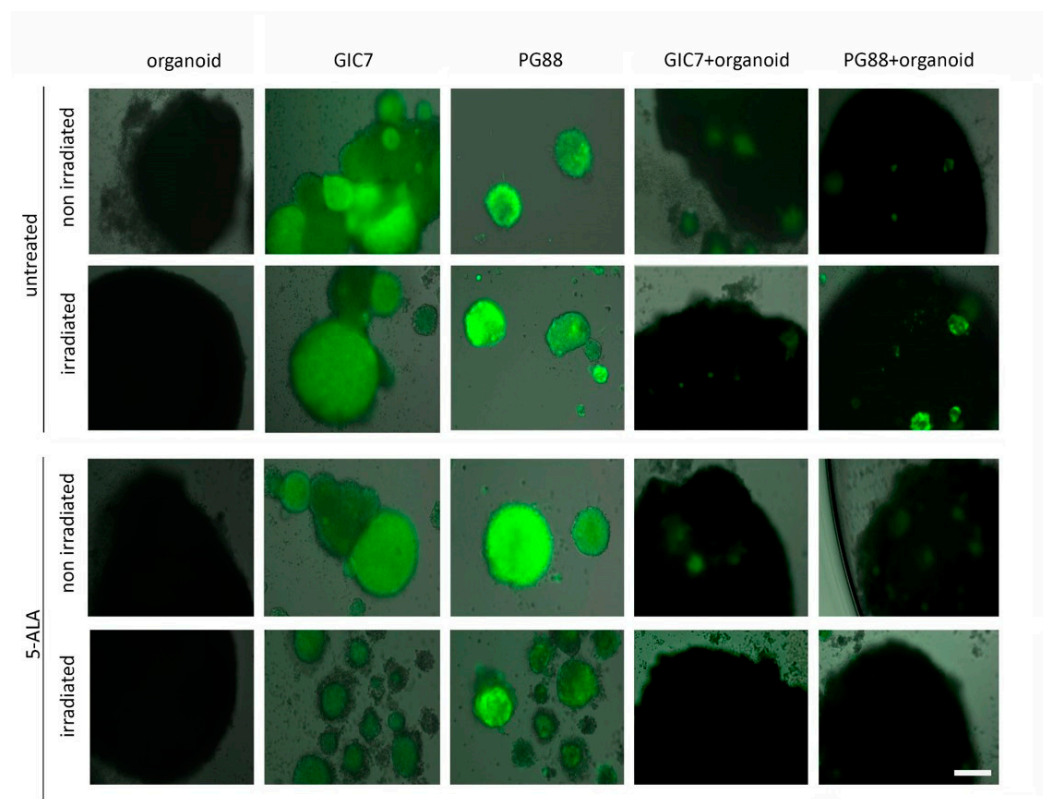

**Figure S3.** Comparison between co-cultures of brain organoids engrafted with GIC7 and PG88 GFP-GICs cells. Green fluorescence pictures of brain organoids and GICs taken 72 h after cells were exposed to the photodynamic treatment consisted on 50  $\mu\text{g/mL}$  of 5-ALA incubated for 24 h. Pictures are representative of many pictures made in each of the plate wells. Scale bar: 250  $\mu\text{m}$ .

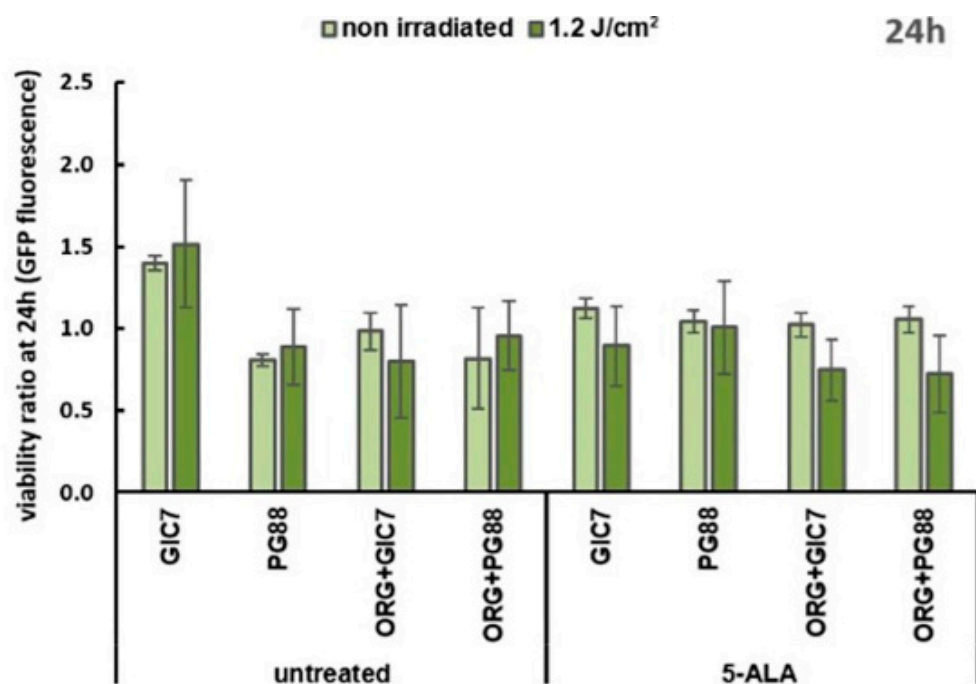

**Figure S4.** Cell viability after PDT of tumorspheres alone and co-cultured with brain organoids. GICs viability after 24 h post-irradiation using the GFP fluorescence ratio between each endpoint and time 0. Results are the mean  $\pm$  SE of two independent experiments ( $n = 2$ ) performed using six replicates.
